1 **Development of diagnostic SNP markers for quality assurance and control in sweetpotato**  
2 **[*Ipomoea batatas* (L.) Lam.] breeding programs**

3 Dorcus C Gemenet<sup>1</sup>, Mercy N Kitavi<sup>1</sup>, Maria David<sup>2</sup>, Dorcah Ndege<sup>1</sup>, Reuben T Ssali<sup>3</sup>, Jolien  
4 Swanckaert<sup>4</sup>, Godwill Makunde<sup>5</sup>, G Craig Yencho<sup>6</sup>, Wolfgang Gruneberg<sup>2</sup>, Edward Carey<sup>3</sup>,  
5 Robert O Mwangi<sup>4</sup>, Maria I Andrade<sup>5</sup>, Simon Heck<sup>1</sup>, Hugo Campos<sup>2</sup>

6

7 1 International Potato Center (CIP), ILRI Campus, Nairobi, Kenya

8 2 International Potato center (CIP), Apartado 1558, Lima 12, Peru

9 3 International Potato Center (CIP), Kumasi, Ghana

10 4 International Potato Center (CIP), Kampala, Uganda

11 5 International Potato Center (CIP), Maputo, Mozambique

12 6 North Carolina State University, Raleigh, USA

13 <sup>1</sup> International Potato Center, ILRI Campus, Old Naivasha Road, 25171-00603, Nairobi, Kenya;  
14 Email: [d.gemenet@cgiar.org](mailto:d.gemenet@cgiar.org); Telephone: 254 20 422 3637; ORCID: 0000-0003-4901-1694

15

16 **Author Contribution**

17 DCG, GCY, SH and HC designed and managed the study, MNK, MD, DN managed tissue  
18 sampling and genotyping, RTS, JS, GM, WG, EC, ROM, MIA developed the parents and  
19 populations, DCG analyzed the data and wrote the manuscript, all authors read, contributed and  
20 approved the manuscript

21

22 **Key Words**

23 Sweetpotato, quality assurance, quality control, population structure, breeding programs

24

25 **Key Message**

26 A 36-SNP diagnostic marker set has been developed for quality assurance and control to support  
27 global sweetpotato breeding optimization efforts. Breeding population structure is shaped by  
28 sweetpotato virus disease prevalence.

29 **Abstract**

30 Quality assurance and control (QA/QC) is an essential element of a breeding program's  
31 optimization efforts towards increased genetic gains. Due to auto-hexaploid genome complexity,  
32 a low-cost marker platform for routine QA/QC in sweetpotato breeding programs is still  
33 unavailable. We used 662 parents of the International Potato Center (CIP)'s global breeding  
34 program spanning Peru, Uganda, Mozambique and Ghana, to develop a low-density highly  
35 informative single nucleotide polymorphism (SNP) marker set to be deployed for routine  
36 QA/QC. Segregation of the selected 30 SNPs (two SNPs per base chromosome) in a recombined  
37 breeding population was evaluated using 282 progeny from some of the parents above. The  
38 progeny were replicated from *in-vitro*, screenhouse and field, and the selected SNP-set was  
39 confirmed to identify relatively similar mislabeling error rates as a high density SNP-set of  
40 10,159 markers. Six additional trait-specific markers were added to the selected SNP set from  
41 previous quantitative trait loci mapping. The 36-SNP set will be deployed for QA/QC in  
42 breeding pipelines and in fingerprinting of advanced clones or released varieties to monitor  
43 genetic gains in farmers fields. The study also enabled evaluation of CIP's global breeding  
44 population structure and the effect of some of the most devastating biotic stresses like  
45 sweetpotato virus disease on genetic variation management. These results will inform future  
46 deployment of genomic selection in sweetpotato.

47 **Conflict of Interest**

48 On behalf of all co-authors, the corresponding author declares no conflict of interest

## 49 **Acknowledgements**

50 Genotyping for this work was funded by the SUSTAIN project awarded to the International  
51 Potato Center by Department for International Development (DFID) through grant Number  
52 (1198-DFID). Most co-authors were supported by a Bill & Melinda Gates Foundation (BMGF)  
53 grant (Grant number OPP1052983) awarded to North Carolina State University. Sincere thanks  
54 to the Integrated Genotyping Service and Support (IGSS) platform for genotyping the  
55 populations. The work was carried out as part of the Consultative Group on International  
56 Agricultural Research (CGIAR)-Research Program on Roots, Tubers and Bananas (RTB) which  
57 is supported by CGIAR Fund Donors (<http://www.cgiar.org/about-us/our-funders/>).  
58 Additionally, the authors acknowledge all technical breeding teams in Ghana, Mozambique, Peru  
59 and Uganda.

60

## 61 **Introduction**

62 Development of user-friendly, low-cost, high-throughput markers for quality assurance and  
63 control (QA/QC) in a genomic-assisted breeding era is a critically important aspect in crop  
64 improvement and germplasm conservation (**Semagn et al. 2012; Ndjiondjop et al. 2018**). This  
65 is because genetic fidelity and trueness-to-type are often not phenotypically obvious. The use of  
66 molecular markers for QC/QA has been implemented in several plants and animals and single  
67 nucleotide polymorphism (SNP) markers have become the markers of choice in germplasm  
68 characterization and QA/QC (**Ertiro et al. 2015**). For example, **Cullingham et al. (2013)**  
69 developed transcriptome-derived SNP markers for cost-efficient forest seed stock identification,  
70 **Frey et al. (2013)** developed ‘near-minimal’ sets of SNPs to differentiate operational taxonomic

71 units in fruit flies, while **Curk et al. (2015)** developed species-diagnostic SNP markers to  
72 analyze admixture structure of varieties and rootstocks in citrus. Here we define QA and QC  
73 according to **Gowda et al. (2017)** who defined QA as the process or set of processes used to  
74 measure the quality of a product and QC as the process of ensuring products and services meet  
75 consumer expectations. In plant breeding, QA would refer to all measures put in place to prevent  
76 errors and create a high-quality variety, while QC is the process of identifying the defects or  
77 errors in the quality of the breeding line, germplasm accession, variety, or any other product  
78 from the breeding pipeline. Solid QA/QC procedures are critical in plant breeding, as errors in  
79 the process of developing new varieties can lead to wasted time and resources, and also to reduce  
80 and/or cancel out genetic gains achieved because of genotype mix-ups along the breeding  
81 pipeline.

82 For most crops, the same SNP set can be used in a QA program to characterize germplasm, and  
83 study genetic diversity, genetic relationships and population structure, and in a QC program to  
84 evaluate genetic identity, genetic purity, parent-offspring identity, validation of crosses in  
85 nurseries and trait-specific testing (**Ertiro et al. 2015; Gowda et al. 2017**). Genotype  
86 misclassification is a common problem in most crops as has been reported in *Oryza spp* (**Orjuela**  
87 **et al. 2014**), *Brassica spp* (**Mason et al. 2015**) and sweetpotato (*Ipomoea batatas*; **Gemenet et**  
88 **al. 2019a**), and misclassification has consequences in breeding and variety development. QA/QC  
89 have become even more important with the advent of molecular markers for decision support in  
90 breeding programs. Whereas the importance of QC filtration methods for SNP markers are well  
91 established (**Forneris et al. 2015; Jarquin et al. 2019**) and methods put in place, QA/QC of the  
92 phenotypes that are combined with genotypes to predict performance are generally not very well  
93 established. The general lack of phenotype/genotype concordance has led to molecular decision

94 support tools for increasing genetic gains in plant breeding such as genomic selection not  
95 achieving their full potential. Although well acknowledged in human and animal genetic fields  
96 (**Buyske et al. 2009; Smith et al. 2013**), reports on the effects of poor QA/QC and genotype  
97 misclassification in plant breeding are generally lacking. With next- and third-generation  
98 sequencing methods enhancing rapid and cost-efficient development of large amounts of  
99 genomic data (**van Dijk et al. 2018; Jarquin et al. 2019**), one of the biggest challenges of plant  
100 breeding programs is putting in place highly precise mechanisms for QA/QC of the  
101 phenotyping/genotyping processes.

102 Sweetpotato is a crop of increasing importance in sub-Saharan Africa (SSA) contributing to both  
103 food and nutritional security, from both adapted, starchy, white-fleshed varieties and new  
104 improved high  $\beta$ -carotene, orange-fleshed varieties (**Mwanga et al. 2011; Low et al. 2009,**  
105 **2017**). The International Potato Center (CIP), one of the centers of the Consultative Group on  
106 International Agricultural Research (CGIAR), runs a global sweetpotato improvement program.  
107 CIP is headquartered in Lima, Peru and has established three additional breeding support  
108 platforms in SSA. The support platform at Lima offers global technical support, while the east  
109 and central Africa platform focusses on end-user preferred varieties within this region including  
110 resistance to sweetpotato virus disease (SPVD), a major production constraint within the region.  
111 The southern Africa breeding support platform focusses on end-user preferred varieties in  
112 addition to drought tolerance which is the major production constraint in this region, while the  
113 west African support platform focusses on culinary aspects, especially the 'less sweet'  
114 sweetpotato which is preferred in this region (**Low et al. 2017**). Being mainly an auto-hexaploid,  
115 genomic-assisted breeding (GAB) tools are just starting to be mainstreamed into the breeding  
116 program due to genome complexity. Several genomic tools have been developed, in partnership

117 with several development partners and a molecular breeding team is currently stationed at CIP's  
118 regional office for SSA in Nairobi, Kenya to facilitate this mainstreaming. Recently, the first  
119 attempt of QA/QC identified misclassification errors of about 30% in one breeding trial while  
120 germplasm moved from *in-vitro* to greenhouse to field (**Gemenet et al. 2019a**). That study,  
121 using high density SNP markers, recommended putting in place QA/QC measures to enhance the  
122 likelihood of success applying GAB in sweetpotato breeding. The main objectives of the current  
123 study were: i) to characterize breeding population parents from global support platforms for  
124 population structure, ii) to estimate allele diversity and linkage disequilibrium among the  
125 breeding population parents from the four global support platforms iii) to develop a low-cost  
126 diagnostic SNP set for rapid QA/QC of sweetpotato breeding populations.

## 127 **Materials and Methods**

### 128 **Genetic materials**

129 We collected parents from all four global breeding support platforms of CIP: Peru, being the  
130 global support platform; Uganda, being the support platform for east and central Africa;  
131 Mozambique, being the support platform for southern Africa; and Ghana, being the support  
132 platform for west Africa. We had 331 parents from Peru, 126 parents from Uganda, 144 parents  
133 from Mozambique and 61 parents from Ghana, totaling 662 parents. The list of the breeding  
134 population parents is provided in **Online Resource 1**. Since our objective was to mainstream  
135 QA/QC in breeding trials, we used progeny from a breeding population to validate that the  
136 finally selected SNP set segregates in recombined individuals from parents. These validation  
137 materials were derived from a breeding population progeny developed from the east and central  
138 African support platform, named the Mwanga Diversity Panel (MDP) and described in **Gemenet**  
139 **et al. (2019a)**.

## 140 **Genotyping and SNP calling**

141 DNA from the breeding population parents was extracted at the Biosciences east and central  
142 Africa (BecA) laboratories based at the International Livestock Research Institute (ILRI),  
143 Nairobi. The extraction was done following a modified cetyl trimethylammonium bromide  
144 (CTAB) method optimized for sweetpotato. The DNA was treated for contaminating RNA using  
145 RNase A, quantified and normalized using standard protocols. The DNA was then submitted for  
146 sequencing using the Diversity Array Technology's DArTSeq method implemented by BecA's  
147 Integrated Genotyping Service and Support platform (IGSS) as described by **Kosmowski et al.**  
148 **(2018)**. IGSS is a subsidized genotyping platform supported by the Bill and Melinda Gates  
149 Foundation to enhance use of genomics in breeding for SSA. Sequencing was done at 96-plex,  
150 high density and SNP calling done using DArT's proprietary software DArTSoft (**Kosmowski et**  
151 **al. 2018**), with aligning to the diploid reference genome of *Ipomoea trifida*, a relative of  
152 sweetpotato (**Wu et al. 2018**). Given that most commercial genotyping platforms have allele  
153 depth coverage ~25x to 30x, previous studies (**Gemenet et al. under preparation**) have shown  
154 that this depth of coverage is not adequate to call allele dosage with confidence in genotype  
155 quality for hexaploid sweetpotato. The study also showed that in such cases, 'diploidized'  
156 biallelic loci which are informative enough performed almost as well as data with high  
157 confidence dosage information. Therefore, biallelic markers used in this study were called in a  
158 diploidized version. A total of 9,670 SNP markers were obtained. Since the aim of the study was  
159 to develop a low-density SNP set for QA/QC, we stringently filtered the genotype data to  $\leq 25\%$   
160 missingness ( $\geq 75\%$  call rate),  $\geq 0.25$  polymorphic information content (PIC) and  $\geq 10\%$  minimum  
161 allele frequency (MAF), for further data analysis. The data is provided as **Online Resource 2**.

## 162 **Data analysis and validation**

163 ***Population structure of International Potato Center's breeding parents***

164 Since allele frequencies through genotype calling are biased when allele depth of coverage is  
165 relatively low (**Maruki and Lynch 2017**) and given that we used diploidized markers for a  
166 hexaploid, we used non-parametric methods as described by **Gao and Starmer (2007)**, to  
167 estimate allele sharing distance (ASD). These methods do not assume Hardy-Weinberg  
168 equilibrium or linkage equilibrium and were implemented using the program AWClust 3.1. The  
169 phylogenetic tree was constructed using MEGA X program (**Kumar et al. 2018**). For allele  
170 diversity, Nei's coefficients of inbreeding ( $F_{IS}$ ) (**Nei 1977**) and Wright's inbreeding coefficients  
171 ( $F_{ST}$  or  $\theta$ ) according to **Weir and Cockerham (1984)**, were estimated in R. Additionally, linkage  
172 disequilibrium (LD) between pairs of markers used for parental population structure was done  
173 using the LDheatmap package in R, with the option of estimating  $r^2$ .

174 ***Selection of a diagnostic SNP set***

175 Given that our objective was to develop a QA/QC SNP set that would be diagnostic for the  
176 global breeding population, we selected SNPs identified from parents as described above but also  
177 validated the selected SNPs using progeny from the recombined MDP breeding population. The  
178 MDP population was developed by crossing 16 parents from the east and central African support  
179 platform. The parents were crossed in 8\*8 without reciprocals following a B\*A pseudo-heterotic  
180 grouping based on genetic distance established by simple sequence repeat (SSR) markers (**David**  
181 **et al. 2018**). With about 30 genotypes per family on average leading to ~2000 genotypes, about  
182 5% of this population was selected for QA/QC, tracking the population from *in vitro*, through  
183 screen house and field (**Gemenet et al. 2019a**). To develop a rapid QA/QC intermediate marker  
184 set, we selected only high-quality SNP markers that were present in both the parents and the  
185 MDP breeding population progeny. The selected markers were confirmed if they kept the same



186 population structure of the parents and still identified the same error rate in the MDP population.  
187 Several studies have selected rapid QA/QC sets with as low as 10 SNP markers e.g. in Maize  
188 (**Chen et al. 2016**). However, the base chromosome number of sweetpotato is 15 and given that  
189 we were diploidizing hexaploid loci, our aim was to have a minimum of two markers per base  
190 chromosome. We performed principal component analysis of the intermediate marker set  
191 according to **Chen et al. (2016)**, but no apparent grouping of the markers was determined. We  
192 therefore selected the final 30 SNP markers based on chromosome number and genetic distance,  
193 from an intermediate marker set of 85 SNP markers. To establish the utility of the 30 selected  
194 SNPs for rapid QA/QC, we compared the ASD of both parents and MDP populations based on  
195 the 30 selected SNPs and the ASD based on their respective original filtered marker sets (205  
196 SNPs for parents and 10,159 SNPs for MDP), using DARwin 6.0.21 tree comparison function  
197 (**Perrier and Jacquemoud-Collet 2006**). The data, including the parental Full-SNP set (9,670  
198 SNP), 205-SNP set, 85-SNP set, and 85-SNP set for MDP are provided in **Online Resource 2**.  
199 The full-SNP set for the MDP is published open-access together with **Gemenet et al. (2019a)**.

## 200 **Results**

### 201 **SNP profile from the parental population**

202 The high-density genotyping resulted in 9,670 SNP markers (**Online Resource 2**) from 662  
203 parents of CIP's breeding population. With filtration of  $\leq 25\%$  missingness,  $\geq 0.25$  polymorphic  
204 information content (PIC) and  $\geq 10\%$  minimum allele frequency (MAF) and an average of 30x  
205 allele depth of coverage we recovered 205 SNP markers that were deemed appropriate for  
206 analysis of the breeding population structure. **Fig. 1** shows quality attributes of the unfiltered and  
207 filtered SNP data. The number of filtered SNPs ranged from six to 18 per base chromosome.

## 208 **Population structure of CIP's Breeding Population**

209 We examined population structure of the parents using 205 SNP markers. As expected from a  
210 global breeding program, population structuring indicated evidence of germplasm transfer  
211 among the breeding support platforms, although there was also evident local adaptation to each  
212 support platform (**Fig. 2**). The global support platform in Peru had the highest number of parents  
213 in the current study. Clustering showed that there is a group of parents from Peru that are closely  
214 related to African breeding parents especially those from Ghana and Mozambique. However, an  
215 additional group was only unique to Peru (**Fig. 2**). This group can also be seen between the first  
216 and second dimensions of a 2D multidimensional scale (**Online Resource 3**). The east and  
217 central Africa support platform in Uganda had a distinct group of parents but also a small  
218 admixed group with Mozambique (**Fig. 2**). The Uganda platform did not have a lot of admixtures  
219 from Peru. Given that the west African support platform was recently established (ca. 2010), and  
220 is the smallest in terms of size, the clustering indicates intake of breeding materials from other  
221 breeding support platforms especially from Mozambique and Peru, with minimal transfer to  
222 Ghana from Uganda. However, on a higher level, the structure can be generalized into two, with  
223 one cluster made up of materials from Peru and Ghana, and the other made up of materials from  
224 Uganda, Mozambique and Peru.

## 225 **Allele diversity and linkage disequilibrium**

226 Nei's coefficients of inbreeding indicated an average of  $F_{IS} = 0.14$  across all populations and that  
227 parents from Uganda had the highest inbreeding coefficient  $F_{IS} = 0.33$ , followed by Mozambique  
228 with  $F_{IS} = 0.24$ . Ghana, followed by Peru had the lowest coefficients of inbreeding at  $F_{IS} = 0.008$   
229 and  $F_{IS} = 0.07$ , respectively. The estimated variance components and fixation indices showed  
230 that the correlation of genes within individuals or inbreeding was  $F = 0.18$ , the correlation of

231 genes in different individuals within the same population was  $\theta = 0.07$ , and the correlation of  
232 genes within individuals within populations  $f = 0.12$ . Comparing  $\theta$  values ( $F_{ST}$ ) between pairs of  
233 populations (support platforms in this case) showed that Uganda was the most distinct group  
234 with  $\theta = 0.08$ ,  $\theta = 0.09$ , and  $\theta = 0.1$  with Ghana, Mozambique and Peru, respectively. The paired  
235  $\theta$  values among Ghana, Mozambique, and Peru were fairly consistent ranging from  $\theta = 0.041$  to  
236  $\theta = 0.049$ . Data is summarized in **Table 1**. Analysis of LD indicated minimal LD among the SNP  
237 markers used with the genome-wide LD having an average  $r^2 \leq 0.1$ . LD per chromosome is  
238 presented in **Fig. 3**. The results show that very few loci were in LD at  $r^2 \geq 0.1$ , as majority of loci  
239 within a chromosome also had  $r^2 \leq 0.1$ . This data indicated that the data set was adequate for  
240 analyzing population structure.

### 241 **Identifying diagnostic markers for routine quality assurance and control of breeding** 242 **populations**

243 To develop QA/QC diagnostic markers from parents that can be used in routine QA/QC of  
244 breeding populations, we added an additional filtering step to the QA/QC parent SNP markers so  
245 as to include only those markers that were also present in genotypic data developed from a  
246 breeding population progeny (MDP). A random 5% (94 genotypes) of the MDP population had  
247 previously been genotyped for QA/QC and genetic fidelity as the population passed through *in*  
248 *vitro*, greenhouse and to the field experiments, using the same genotyping platform. The  
249 genotyping had been done at high density with approximately 41k SNPs filtered down to 10,159  
250 SNPs. Genotype misclassification in the population was then previously estimated based on  
251 10,159 SNPs (**Gemenet et al. 2019a**), which is ‘rich’ for routine QA/QC within most breeding  
252 programs. The desired low-cost, low-density QA/QC SNP set was therefore selected based on  
253 the following criteria: i) ~30x allele depth of coverage; ii)  $\geq 75\%$  call rate; iii)  $\geq 0.25$  PIC; iv)

254  $\geq 10\%$  MAF; v) chromosome position known; vi) be present in a randomly selected population of  
255 progeny. This resulted in further filtration of the 205 SNP markers used for population structure  
256 of the parents above, down to 85 SNP markers (**Online Resource 2**), which could be used for  
257 ‘general QC’ in the sweetpotato breeding programs as proposed by **Chen et al. (2016)**. However,  
258 for routine QC, this marker number is still probably too high for most breeding programs.  
259 Principal component analysis of the 85 markers did not show any specific grouping of markers,  
260 with PC1 and PC2 only explaining 9.1% of the variation (**Online Resource 4**). Therefore, the  
261 final 30 SNP markers were selected based on genetic distance per chromosome. The set of 85  
262 markers were not evenly distributed for all chromosomes and chromosome 15 had only one  
263 marker. To achieve the target of two markers per base chromosome, we selected one marker  
264 from the original set of 205, based on genetic distance relative to the one marker present in the  
265 set of 85. Comparing the population structure of the parents using 205, 85 and 30 SNP markers  
266 indicated that the 30 markers kept the general structure of the populations, though the clustering  
267 was considerably different compared with the use of 205 SNPs (**Fig. 4**). Comparing trees  
268 indicated that the tree developed with 205 SNPs was 17.1% different from the tree with 30 SNPs  
269 when strict conditions were used. For validation of the selected marker set, we also compared the  
270 level of error identified in the breeding population progeny (MDP) using 10,159 SNPs, 85 SNPs  
271 and 30 SNPs (**Fig. 5**). Results show that 10,159 SNPs identified 27.7% misclassification, 85  
272 SNPs identified 29.8% misclassification and 30 SNPs identified 31.9% misclassification. Tree  
273 comparison between 10,159 SNPs and 30 SNPs indicated that they were 24.6% dissimilar when  
274 strict conditions were applied. Combined, these results suggest that the selected 30 SNPs could  
275 be used as a cost-effective rapid QA/QC set for sweetpotato in CIP’s breeding populations. The  
276 selected SNPs are listed in **Table 2**.

## 277 **Addition of trait specific markers to the selected QC set**

278 Previous studies had mapped quantitative trait loci (QTL) for yield and component traits  
279 (**Pereira et al. 2019; Gemenet et al. 2019a**) as well as quality-related traits (**Gemenet et al.**  
280 **2019b**). From these QTL mapping results, we selected six SNP markers that were associated  
281 with dry matter, starch,  $\beta$ -carotene, flesh color and total root yield. The markers labeled ‘trait  
282 specific’ are shown in **Table 2**. The first four traits were selected because they are correlated and  
283 important contributors to culinary traits that affect adoption of new varieties in sweetpotato. Dry  
284 matter and starch are positively correlated but are negatively correlated to both  $\beta$ -carotene and  
285 flesh color, and this negative correlation affects ‘culinary quality’. Additionally, these traits are  
286 oligogenic hence results are repeatable within the QTL. Total storage root yield was selected as a  
287 primary trait and the selected marker of a QTL was found to be a constitutive marker for this trait  
288 across several environments based on multi-environment testing of a full-sib population  
289 (**Gemenet et al. 2019a**).

## 290 **Discussion**

291 Our genotyping efforts resulted in less than 10,000 bi-allelic SNP markers. Stringent filtering  
292 resulted in an even smaller data set of 205 SNP markers. The considerable reduction in highly  
293 informative markers can be associated with the difficulty in genotyping polyploids. With a  
294 mostly auto-hexaploid genome (**Wu et al. 2018**), sweetpotato presents allele dosage uncertainty  
295 due to ambiguous copy numbers of each allele. Additionally, the assumption of random  
296 inheritance of alleles may not hold true in this case due to uncharacterized consequences of  
297 whole genome duplication (**Blischak et al. 2016, 2018**). DArTSeq implements new protocols of  
298 sequencing complexity reduced representations (**Altshuler et al. 2000**) in combination with the  
299 next-generation sequencing methods (**Baird et al. 2008; Elshire et al. 2011**). Implementing

300 genotyping-by-sequencing-like procedures, DArTSeq involves a two-restriction enzyme system  
301 composed of a ‘rare-cutter’ and a ‘common-cutter’, mainly *PstI-MseI*, to enhance uniform  
302 complexity reduction within the genome (**Poland et al. 2012; Brouard et al. 2017**). In such  
303 next-generation sequencing methods, depth of sequencing determines genotyping quality as low  
304 depth of coverage results in genotyping errors, misalignments and a lot of missing data which  
305 eventually cause biases in downstream population-genetic analyses (**Fumagalli 2013; Maruki  
306 and Lynch 2017; Crawford and Lazzaro 2012**). For instance, **Ashraf et al. (2016)** showed that  
307 low sequencing depth resulted in SNPs that underestimated genomic heritability due to  
308 overestimation of inbreeding and underestimation of heterozygosity in rye-grass. We chose to  
309 use ‘diploidized’ data in the current analysis because the depth of coverage from most  
310 genotyping platforms is not adequate to reliably characterize heterozygous loci, such as those  
311 likely to be found in polyploids, for which deep sequencing is required (**Fresnedo-Ramirez et  
312 al. 2019**). Furthermore, analyses comparing genotypic data from DArT-Seq and those from a  
313 deep sequencing optimization platform for sweetpotato called GBSpoly (**Wadl et al. 2018**) have  
314 confirmed that highly informative ‘diploidized’ DArTseq data performed just as well as high  
315 confidence data with dosage in genomic predictions of sweetpotato depending on trait  
316 architecture (**Gemenet et al. under preparation**).

317 Population structure as well as allele diversity analyses in the current study indicated that  
318 parental genotypes from Uganda were the more distinct and inbred. This observation can be  
319 associated with the high sweetpotato virus disease (SPVD) pressure around the lake region of  
320 eastern Africa and a general lack of germplasm with high levels of resistance to SPVD  
321 necessitating the use of the same lines frequently as parents in the Ugandan breeding program  
322 (**Gibson et al. 1998a, 1998b; Ndunguru et al. 2009**). SPVD is the most important virus

323 complex in SSA and its effects are most pronounced in east Africa, causing yield loses of about  
324 56-98% in farmers fields (**Mukasa et al. 2003; Ndunguru and Kapinga 2007**). **Gruneberg et**  
325 **al. (2015)** noted that SPVD prevalence in east Africa resulted in the failure of nearly all orange-  
326 fleshed varieties introduced into this region. SPVD is caused by a synergistic and complex  
327 infection by sweetpotato feathery mottle virus and sweetpotato chlorotic stunt virus, transmitted  
328 by aphids and white-flies, respectively (**Mwanga et al. 2002**). **Clarke et al. (2012)** indicated that  
329 different regions have different strains of the individual virus, and that east Africa has distinct  
330 strains. Studies have also showed that sweetpotato chlorotic stunt virus strains are more related  
331 in east and southern Africa and are distinct from those in the other regions of the world (**Hoyer**  
332 **et al. 1996**). These results are supported by our current population structuring which shows that  
333 Uganda has some ad-mixing with Mozambique, but very little admixing with either Peru or  
334 Ghana. These results have implications extending to other breeding decisions such as  
335 determining the effective population sizes especially for the Uganda breeding platform where  
336 migration of germplasm into the platform is restricted due to SPVD.

337 Different alleles are represented in different genetic backgrounds and our results show allele  
338 diversity between other support platforms with especially the Uganda population. Therefore,  
339 understanding population diversity especially of a global breeding program is important for  
340 breeding decisioning. Breeding programs are currently moving towards genomics-assisted  
341 breeding (GAB). Repeatability of quantitative trait loci in different genetic backgrounds is one  
342 prerequisite for the success of GAB methods such as QTL mapping, genome-wide association  
343 mapping, and genomic selection (**Azevedo et al. 2017; Wientjes et al. 2018**). In genome-wide  
344 association mapping, accounting for population structure avoids false positives and allows  
345 selection of causative variants, while accurate prediction of untested future genotypes in genomic

346 selection is only possible when familial relatedness is accounted for, allowing for a reliable  
347 association between markers and QTL (**Daetwyler et al. 2012**). In the case of our global  
348 breeding population, the current information will be important when designing a genomic  
349 selection scheme to facilitate decisions such as prediction within or across sub-populations.  
350 Similarities and differences in genetic architecture of complex traits between populations can  
351 also be understood by studying the genetic correlation between the populations (**Wientjes et al.**  
352 **2018**). Our results indicate that the Ugandan sub-population was also the most distinct from the  
353 three others when  $\theta$  values ( $F_{ST}$ ) between pairs of populations was examined. This would imply  
354 that predictions may be carried out separately for the Ugandan populations in future GAB  
355 activities, while the predictions may be tested across the platforms in Peru, Mozambique and  
356 Ghana, given similar environmental conditions. Since GAB requires that markers be in LD with  
357 QTL, our results indicating very minimal LD among markers confirm that this marker density is  
358 not enough for making selection decisions (**Flint-Garcia et al. 2003; Vos et al. 2017**). Although  
359 the number of markers used in the current study are adequate for the purposes of the current  
360 objectives of population structuring, more dense markers along the genome will be required to  
361 reliably study the LD decay in sweetpotato. However, ‘high density’ has cost implications and  
362 hence the optimum number of markers required for routine GAB use will need to be reliably  
363 estimated through reducing within-haplotype density by selecting the minimum number of  
364 markers that can define common haplotypes (**Meng et al. 2003**).

365 In the current study, we used filtration and validation methods of DArTSeq developed markers to  
366 select a marker set of 30 SNPs that can be used for QA/QC purposes in sweetpotato. Our  
367 selection of informative markers included considerations for depth of coverage, missingness,  
368 chromosome position, genetic distances, validation for repeatability in progeny and inclusion of



369 trait specific markers to result in a total of 36 SNPs. Development of SNP sets for QA/QC has  
370 been done in several crops. Extensive tests were carried out to develop a SNP set for ‘broad’ and  
371 ‘rapid’ QC in maize (**Chen et al. 2016**). In their study, they showed that marker coverage  
372 between 2 and 15, markers with less than 20% missing values, including markers with  
373 chromosome positions, markers with less than 6% heterogeneity, inclusion of trait specific  
374 markers, and selection of markers from groups based on average group distance gave the best  
375 marker set towards developing a ‘rapid’ QC set, using DArTSeq markers. Prior to this, **Semagn**  
376 **et al. (2012)**, used about 1,597 SNP markers from the KASPar and GoldenGate platforms to  
377 select highly informative markers for low-cost QC genotyping in maize. They recommended a  
378 set of 50-100 SNPs for routine QC after finding about 29% heterogeneity in inbred lines. In rice,  
379 **Ndjiondjop et al. 2018** recommended a subset of 24-36 SNP markers filtered from DArTSeq  
380 developed markers for genetic purity analyses. In sweetpotato, QA/QC problems have recently  
381 been acknowledged (**Gemenet et al. 2019a**) by monitoring the rate of misclassification as  
382 materials moved through different stages of breeding trialing. That study indicated about 30%  
383 misclassification issues in one breeding population. QA/QC in sweetpotato breeding trials will  
384 improve precision and breeding efficiency through use of new methods like forward breeding  
385 and genomic selection currently being adopted by CGIAR programs. These new breeding  
386 strategies are aimed towards increasing the rate of genetic gains from breeding to address issues  
387 related with population increase and climate change. Therefore, QA/QC of breeding processes  
388 will improve the likelihood of success.

389 Since the real impact from breeding can only be measured by the improvements observed in  
390 farmers’ fields, controlling and assuring the quality of finished varieties is important to breeding  
391 programs. Issues with QA/QC of released varieties have been reported in sweetpotato and this is

392 exacerbated because the extent of adoption of new varieties cannot be determined accurately  
393 especially with informal seed systems where genetic integrity is seldom considered (**Namanda**  
394 **et al. 2011**). In Ethiopia, **Kosmowski et al. (2018)** used 17,220 DArTSeq developed markers to  
395 establish that about 20% of farmers confused local varieties for improved varieties and vice  
396 versa, and that farmers assigned different local names to the same variety or vice versa. Their  
397 study confirmed that data from survey studies (**Labeyrie et al. 2014; Wossen et al. 2017**) were  
398 mostly unreliable. Despite this important revelation, high density genotyping at 17,220 markers  
399 is not amenable for widespread routine use, therefore leaving household surveys as the  
400 predominant way of carrying out adoption studies. The currently developed marker set will  
401 therefore be useful in addressing also adoption-related needs in sweetpotato.

402 Towards increasing genetic gains in the sweetpotato breeding programs, QA/QC will need to be  
403 combined with other approaches of optimizing breeding schemes.

#### 404 **Data Availability**

405 All data associated with this manuscript are provided together with the manuscript as  
406 supplementary (Online Resource 2).

#### 407 **Figure Captions**

408 **Fig. 1** Quality attributes of unfiltered (9,670; Top) and filtered (205; Bottom) SNPs from  
409 DArTSeq indicating call rate (A), frequency of homozygotes for the reference allele (B),  
410 frequency of homozygotes for the alternative allele (SNP; C), frequency of heterozygotes in the  
411 data (D), polymorphic information content of the SNP (E), and average polymorphic information  
412 content between reference and SNP alleles (F)

413 **Fig. 2** Phylogenetic tree (Neighbor-Joining) showing the population structure of the International  
414 Potato Center (CIP)'s global breeding parents. Genotypes in Black represent parents from the  
415 global support platform in Peru, genotypes in Blue represent parents from the southern Africa  
416 support platform in Mozambique, genotypes in Green represent parents from the east and central  
417 Africa support platform in Uganda, while genotypes in Red represent parents from the west  
418 African support platform in Ghana. The tree was developed using MEGA X.

419 **Fig. 3** Linkage disequilibrium among 205 markers used in population structure analysis,  
420 analyzed per chromosomes for the 15 base chromosomes of hexaploid sweetpotato

421 **Fig. 4** Phylogenetic trees (Neighbor-Joining) comparing the clustering of the International Potato  
422 Center (CIP)'s breeding parents using 205 highly informative SNP markers (left), 85-SNP  
423 intermediate marker set (center) and the 30-SNP selected QA/QC set markers (right). Genotypes  
424 in Violet represent parents from the global support platform in Peru, genotypes in Green  
425 represent parents from the southern Africa support platform in Mozambique, genotypes in  
426 Orange represent parents from the east and central Africa support platform in Uganda, while  
427 genotypes in Blue represent parents from the west African support platform in Ghana. Trees  
428 were developed using DARwin 6.0.21

429 **Fig. 5** Sankey diagrams showing mislabeling error as Mwanga diversity Panel (MDP) population  
430 moved from *in-vitro* to screen house to field, based on 10,159 SNPs, 85-SNP intermediate  
431 marker set and 30-SNP selected quality control (QC)-set. The Pink color indicates those that did  
432 not cluster (with mislabeling errors) while the grey color indicates those that clustered as  
433 expected, implying no mislabeling errors

434 **Online Resource Captions**

435 **Online Resource 1** List of parental genotypes from the International Potato Center (CIP)'s  
436 global breeding program indicating breeding support platform of origin.

437 **Online Resource 2** DArTSeq data used in the current study in separate excel sheets showing the  
438 original data set of 9,670 SNPs (Parents-Full), 205 stringently filtered and highly polymorphic  
439 SNPs (Parents-205), 85-SNP intermediate with highlighted 30-SNP selected QA/QC set based  
440 on parents (Parents-85&Selected QC Set), and 85-SNP intermediate marker set with highlighted  
441 selected QA/QC set based on the progeny of the Mwanga Diversity Panel (MDP-85&Selected  
442 QC Set)

443 **Online Resource 3** Two-dimensional figure from multidimensional scaling of the International  
444 Potato center (CIP)'s global sweetpotato breeding parents as observed using 205 highly  
445 informative SNP markers

446 **Online Resource 4** Principle component analysis (PCA) carried out on 85-SNP intermediate  
447 marker set to check for possible groupings to aid the selection of a 30-SNP quality control  
448 marker set

#### 449 **References**

450 Altshuler D, Pollara VJ, Cowles CR, Van Etten WJ, Baldwin J, Linton L, Lander ES (2000) An  
451 SNP map of the human genome generated by reduced representation shotgun sequencing.

452 Nature 407:513-516

453 Ashraf BH, Byrne S, Fé D, Czaban A, Asp T, Pedersen MG et al (2016) Estimating genomic  
454 heritabilities at the level of family-pool samples of perennial ryegrass using genotyping-

455 by-sequencing. Theor Appl Genet 129:45–52

- 456 Azevedo CF, de Resende MDV, e Silva FF, Nascimento M, Viana JMS, Valente MSF (2017)  
457 Population structure correction for genomic selection through eigenvector covariates.  
458 Crop Breeding and Applied Biotechnology 17:350-358
- 459 Baird NA, Etter PD, Atwood TS, Currey MC, Shiver AL, Lewis ZA et al (2008) Rapid SNP  
460 discovery and genetic mapping using sequenced RAD markers. PLoS One 3: e3376
- 461 Blischak PD, Kubatko LS, Wolfe AD (2018) Accounting for genotype uncertainty in the  
462 estimation of allele frequencies in autopolyploids. Mol Ecol Resources 16:742–754
- 463 Blischak PD, Kubatko LS, Wolfe AD (2018) SNP genotyping and parameter estimation in  
464 polyploids using low-coverage sequencing data. Bioinformatics 34(3):407–415
- 465 Brouard J-S, Boyle B, Ibeagha-Awemu EM, Bissonnette N (2017) Low-depth genotyping-by-  
466 sequencing (GBS) in a bovine population: strategies to maximize the selection of high-  
467 quality genotypes and the accuracy of imputation. BMC Genetics 18:32
- 468 Buyske S, Yang G, Matisse TC, Gordon D (2009) When a case is not a case: effects of phenotype  
469 misclassification on power and sample size requirements for the transmission  
470 disequilibrium test with affected child trios. Human Hered 67(4):287–92
- 471 Chen J, Zavala C, Ortega N, Petroli C, Franco J, Burgueño J, Costich DE, Hearne SJ (2016) The  
472 development of quality control genotyping approaches: A case study using elite maize  
473 lines. PLoS ONE 11(6): e0157236
- 474 Clark CA, Davis JA, Abad JA, Cuellar WJ, Fuentes S, Kreuze JF et al (2012) Sweetpotato  
475 viruses: 15 years of progress on understanding and managing complex diseases. Plant  
476 Disease 96:168–185
- 477 Crawford JE, Lazzaro BP (2012) Assessing the accuracy and power of population genetic  
478 inference from low-pass next-generation sequencing data. Front in Genet 3:66

- 479 Cullingham CI, Cooke JEK, Dang S, Coltman DW (2013) A species-diagnostic SNP panel for  
480 discriminating lodgepole pine, jack pine, and their interspecific hybrids. *Tree Genetics*  
481 *and Genomes* 9:1119–1127
- 482 Curk F, Ancillo G, Ollitrault F, Perrier X, Jacquemoud-Collet J-P, Garcia-Lor A, Navarro L,  
483 Ollitrault P (2015) Nuclear species-diagnostic SNP markers mined from 454 amplicon  
484 sequencing reveal admixture genomic structure of modern citrus varieties. *PLoS One* 10:  
485 e0125628
- 486 Daetwyler HD, Kemper KE, van der Werf JHJ, Hayes BJ (2012) Components of the accuracy of  
487 genomic prediction in a multi-breed sheep population. *J Anim Sci* 90:3375–3384
- 488 David MC, Diaz FC, Mwanga ROM, Tumwegamire S, Mansilla RC, Grüneberg WJ (2018) Gene  
489 pool subdivision of east African sweetpotato parental material. *Crop Sci* 58:2302–2314
- 490 Elshire RJ, Glaubitz JC, Sun Q, Poland JA, Kawamoto K, Buckler ES Mitchell SE (2011) A  
491 robust, simple genotyping-by-sequencing (GBS) approach for high diversity species.  
492 *PLoS One* 6(5): e19379
- 493 Ertiro BT, Ogugo V, Worku M, Das B, Olsen M, Labuschagne M, Semagn K (2015)  
494 Comparison of Kompetitive Allele Specific PCR (KASP) and genotyping by sequencing  
495 (GBS) for quality control analysis in maize. *BMC Genomics* 16:908
- 496 Flint-Garcia SA, Thornsberry JM, Buckler ES IV (2003) Structure of linkage disequilibrium in  
497 plants. *Annu Rev Plant Biol* 54:357–374
- 498 Forneris NS, Legarra A, Vitezica ZG, Tsuruta S, Aguilar I, Misztal I, Cantet RJC (2015) Quality  
499 control of genotypes using heritability estimates of gene content at the marker. *Genetics*  
500 199:675–681

- 501 Fresnedo-Ramírez J, Yang S, Sun Q, Karn A, Reisch BI, Cadle-Davidson L (2019)  
502 Computational analysis of ampSeq data for targeted, high-throughput genotyping of  
503 amplicons. *Front Plant Sci* 10:599
- 504 Frey JE, Guillén L, Frey B, Samietz J, Rull J, Aluja M (2013) Developing diagnostic SNP panels  
505 for the identification of true fruit flies (Diptera: Tephritidae) within the limits of COI  
506 based species delimitation. *BMC Evol Biol* 13:106
- 507 Fumagalli M (2013) Assessing the effect of sequencing depth and sample size in population  
508 genetics inferences. *PLoS One* 8(11): e79667
- 509 Gao X, Starmer J (2007) Human population structure detection via multilocus genotype  
510 clustering. *BMC Genetics* 8:34. doi:10.1186/1471-2156-8-34
- 511 Gemenet DC, De Boeck B, Pereira GDS, Kitavi MN, Ssali RT, Utoblo O et al (2019a) When a  
512 phenotype is not the genotype: Implications of phenotype misclassification and pedigree  
513 errors in genomics-assisted breeding of sweetpotato [*Ipomoea batatas* (L.) Lam.].  
514 BiorXiv Preprint doi: <https://doi.org/10.1101/747469>
- 515 Gemenet DC, Pereira GDS, De Boeck B, Wood JC, Mollinari M, Olukolu BA et al (2019)  
516 Quantitative trait loci and differential gene expression analyses reveal the genetic basis  
517 for negatively-associated  $\beta$ -carotene and starch content in hexaploid sweetpotato  
518 [*Ipomoea batatas* (L.) Lam.]. *Theor App Genet* DOI :10.1007/s00122-019-03437-7
- 519 Gibson RW, Kaitisha GC, Randrianaivoarivony JM (1998a) Identification of the east African  
520 strain of sweetpotato chlorotic stunt virus as a major component of sweetpotato virus  
521 disease in southern Africa. *Plant Dis* 132:1063

- 522 Gibson RW, Mpembe I, Alicai T, Carey EE, Mwanga ROM, Seal SE, Vetten HJ (1998b)  
523 Symptoms, aetiology and serological analysis of sweet potato virus disease in Uganda.  
524 Plant Pathol 47:95-102
- 525 Gowda M, Worku M, Nair SK, Palacios-Rojas N, Huestis G, Prasanna BM (2017) Quality  
526 Assurance/ Quality Control (QA/QC) in Maize Breeding and Seed Production: Theory  
527 and Practice. CIMMYT: Nairobi
- 528 Grüneberg WJ, Ma D, Mwanga ROM, Carey EE, Huamani K, Diaz F et al (2015) Advances in  
529 sweetpotato breeding from 1992 to 2012. In: Low JW, Nyongesa M, Quinn S Parker M  
530 (eds) Potato and Sweetpotato in Africa: Transforming the Value Chains for Food and  
531 Nutrition Security. CABI, pp3-68
- 532 Hoyer U, Maiss E, Jekmann W, Lessemann DE, Vette HJ (1996) Identification of coat protein  
533 gene of sweetpotato sunken vein cloterovirus from Kenya and evidence for serological  
534 relationship among geographically diverse cloterovirus isolates from sweetpotato.  
535 Phytopath 47:582-587
- 536 Jarquín D, Howard R, Graef G, Lorenz A (2019) Response surface analysis of genomic  
537 prediction accuracy values using quality control covariates in soybean. Evol  
538 Bioinformatics 15:1-7
- 539 Kosmowski F, Aragaw A, Kilian A, Ambel A, Ilukor J, Yigezu B, Stevenson J (2018) Varietal  
540 Identification in household surveys: Results from three household-based methods against  
541 the benchmark of DNA fingerprinting in southern Ethiopia. Expl Agric  
542 DOI: 10.1017/S0014479718000030



- 543 Kumar S, Stecher G, Li M, Knyaz C, Tamura K (2018) MEGA X: Molecular Evolutionary  
544 Genetics Analysis across computing platforms. *Molecular Biology and*  
545 *Evolution* 35:1547-1549
- 546 Labeyrie V, Deu M, Barnaud A, Calatayud C, Buiron M, Wambugu P, Manel S, Glaszmann J-C  
547 Leclerc C (2014) Influence of ethnolinguistic diversity on the sorghum genetic patterns in  
548 subsistence farming systems in Eastern Kenya. *PLoS One* 9: e92178
- 549 Low JW, Lynam J, Lemaga B, Crissman C, Barker I, Thiele G et al (2009) Sweetpotato in Sub-  
550 Saharan Africa. In: Loebenstein G, Thottappilly G (eds) *The Sweetpotato*. Springer  
551 Science + Business Media, B.V Dordrecht, pp359-390
- 552 Low JW, Mwanga ROM, Andrade M, Carey E, Ball A (2017) Tackling vitamin A deficiency  
553 with biofortified sweetpotato in sub-Saharan Africa. *Global Food Secur* 14:23–30
- 554 Maruki T, Lynch M (2017) Genotype Calling from Population-Genomic Sequencing Data. *G3:*  
555 *Genes Genomes Genetics* doi: <https://doi.org/10.1534/g3.117.039008>
- 556 Mason AS, Zhang J, Tollenaere R, Vasquez-Teuber P, Dalton-Morgan J, Hu L, Yan G, Edwards  
557 D, Redden R, Batley J (2015) High-throughput genotyping for species identification and  
558 diversity assessment in germplasm collections. *Mol Ecol Resour* 15:1091–1101
- 559 Meng Z, Zaykin DV, Xu C-F, Wagner M, Ehm MG (2003) Selection of genetic markers for  
560 association analyses, using linkage disequilibrium and haplotypes. *Am J Hum Genet*  
561 73:115–130
- 562 Mukasa SB, Rubaihayo PR, Valkonen, JPT (2003) Incidence of viruses and virus-like diseases of  
563 sweetpotato in Uganda. *Plant Dis* 87:329-335
- 564 Mwanga ROM, Ghislain M, Kreuze J, Ssemakula GN, Yencho GC (2011) Exploiting the use of  
565 biotechnology in sweetpotato for improved nutrition and food security: Progress and

- 566 future outlook In: Nampala P, Makara MA (eds) Proceedings of the International  
567 Conference on Agro-Biotechnology, Biosafety and Seed Systems in Developing  
568 Countries, Science Foundation for Livelihoods and Development pp25-31, Kampala,  
569 Uganda
- 570 Mwanga ROM, Moyer J, Zhang D, Carey EE, Yencho GC (2002) Nature of resistance to  
571 sweetpotato virus diseases. *Acta Horticulturae* 583:113–119
- 572 Namanda S, Gibson R, Sindi K (2011) Sweetpotato seed systems in Uganda, Tanzania and  
573 Rwanda. *Journal of Sustainable Agriculture* 35(8):870–884
- 574 Ndjiondjop MN, Semagn K, Zhang J, Gouda AC, Kpeki SB, Goungoulou A, Wambugu P,  
575 Dramé KN, Bimpong IK, Zhao, D (2018) Development of species diagnostic SNP  
576 markers for quality control genotyping in four rice (*Oryza L.*) species. *Mol Breed* 38:131
- 577 Ndunguru J, Kapinga R (2007) Viruses and virus-like diseases affecting sweetpotato subsistence  
578 farming in southern Tanzania. *Afr J Agric Res* 5:232-239
- 579 Ndunguru J, Kapinga R, Sseruwagi P, Sayi B, Mwanga R, Tumwegamire S, Rugutu C (2009)  
580 Assessing the sweetpotato virus disease and its associated vectors in northwestern  
581 Tanzania and central Uganda. *Afr J Agric Res* 4(4):334-343
- 582 Nei MF (1977) Statistics and analysis of gene diversity in subdivided populations. *Annals of*  
583 *Human Genetics* 41:225–233
- 584 Orjuela J, Sabot F, Chéron S, Vigouroux Y, Adam H, Chrestin H, Sanni K, Lorieux M,  
585 Ghesquière A (2014) An extensive analysis of the African rice genetic diversity through a  
586 global genotyping. *Theor Appl Genet* 127:2211–2223
- 587 Pereira GDS, Gemenet DC, Mollinari M, Olukolu BA, Diaz F, Mosquera V, Gruneberg WJ,  
588 Khan A, Yencho GC, Zeng Z-B. (2019) Multiple QTL mapping in autopolyploids: a

589 random-effect model approach with application in a hexaploid sweetpotato full-sib  
590 population. BioRxiv Preprint doi: <https://doi.org/10.1101/622951>

591 Perrier X, Jacquemoud-Collet JP (2006) DARwin software <http://darwin.cirad.fr/darwin>

592 Poland JA, Brown PJ, Sorrells ME, Jannink J-L (2012) Development of high-density genetic  
593 maps for barley and wheat using a novel two-enzyme genotyping-by-sequencing  
594 approach. PLoS One 7: e32253

595 Semagn K, Beyene Y, Makumbi D, Mugo S, Prasanna BM, Magorokosho C et al (2012) Quality  
596 control genotyping for assessment of genetic identity and purity in diverse tropical maize  
597 inbred lines. Theor Appl Genet 125:1487–1501

598 Smith S, Hay EH, Farhat N, Rekaya R (2013) Genome wide association studies in presence of  
599 misclassified binary responses. BMC Genetics 14:124

600 van Dijk EL, Jaszczyszyn Y, Naquin, D, Thermes C (2018) The Third Revolution in Sequencing  
601 Technology. Trends in Genetics 34(9). <https://doi.org/10.1016/j.tig.2018.05.008>

602 Vos PG, Paulo MJ, Voorrips RE, Visser RGF, van Eck HJ, van Eeuwijk FA (2017) Evaluation  
603 of LD decay and various LD-decay estimators in simulated and SNP-array data of  
604 tetraploid potato. Theor Appl Genet 130:123–135

605 Wadl PA, Olukolu BA, Branham SE, Jarret RL, Yencho GC, Jackson DM (2018) Genetic  
606 diversity and population structure of the USDA sweetpotato (*Ipomoea batatas*)  
607 germplasm collections using GBSpoly. Front Plant Sci 9:1–13

608 Weir BS, Cockerham CC (1984) Estimating  $F$ -statistics for the analysis of population structure.  
609 Evolution 38:1358–1370

- 610 Wientjes YCJ, Calus MPL, Duenk P, Bijma P (2018) Required properties for markers used to  
611 calculate unbiased estimates of the genetic correlation between populations. *Genet Sel*  
612 *Evol* 50:65
- 613 Wossen T, Tessema G, Abdoulaye T, Rabbi I, Olanrewaju A, Alene A, Feleke S, Kulakow P,  
614 Asumugha G, Adebayo A, Manyong V (2017) The cassava monitoring survey in Nigeria.  
615 Final report. IITA, Ibadan, Nigeria, 66p. ISBN 978-978-8444-81-7
- 616 Wu S, Lau KH, Cao Q, Hamilton JP, Sun H, Zhou C et al (2018) Genome sequences of two  
617 diploid wild relatives of cultivated sweetpotato reveal targets for genetic improvement.  
618 *Nature communications* 9:4580

619 **Table 1.** Allelic diversity parameters among parents of the International Potato Center (CIP)'s  
 620 breeding parents from Ghana, Mozambique, Peru and Uganda.

621

| <b>Nei's <math>F_{IS}</math></b>                              |            |               |        |          |
|---------------------------------------------------------------|------------|---------------|--------|----------|
| Ghana                                                         | Mozambique | Peru          | Uganda | Average  |
| 0.008                                                         | 0.24       | 0.07          | 0.33   | 0.14     |
| <b>Variance and fixation indices</b>                          |            |               |        |          |
| $F=0.18$                                                      |            | $\theta=0.07$ |        | $f=0.12$ |
| <b><math>F_{ST}(\theta)</math> among pairs of populations</b> |            |               |        |          |
|                                                               | Ghana      | Mozambique    | Peru   | Uganda   |
| Ghana                                                         | 0          |               |        |          |
| Mozambique                                                    | 0.049      | 0             |        |          |
| Peru                                                          | 0.046      | 0.041         | 0      |          |
| Uganda                                                        | 0.08       | 0.09          | 0.1    | 0        |

622

623 **Table 2** Details of the 36 SNPs selected for ‘rapid QC’ in sweetpotato. AlleleID refers to the identity of the specific allele on the  
 624 DArT platform, AlleleSeq refers to the flanking sequence of the SNP, Chr indicates the chromosome number, Pos indicates the  
 625 position of a SNP on the specific chromosome, SNP is single nucleotide polymorphism

| No | AlleleID                    | AlleleSeq                                                               | Chr   | Pos      | SNP    |
|----|-----------------------------|-------------------------------------------------------------------------|-------|----------|--------|
| 1  | 7557698 F 0-64:T>A-64:T>A   | TGCAGATAATAATACAAAAACGTGATTTCTATTGTGCACCTAGAAAGTGAGCAGAGTTGTCTGCCATAAGT | Chr01 | 30898063 | 64:T>A |
| 2  | 100736260 F 0-18:C>T-18:C>T | TGCAGTCAGCGACTCTCTCCAATGATATTCTTCTTCTGGAGCTGAGTGGAACTTCTTTCTTTGATTCTA   | Chr01 | 881461   | 18:C>T |
| 3  | 7629110 F 0-28:G>T-28:G>T   | TGCAGTCTTTGCTCTCAAAAGTTTCTTTGGAGTTCTCATATGAATTCTGAACATCACTAATTTGGATTG   | Chr02 | 13184152 | 28:G>T |
| 4  | 7609930 F 0-10:T>G-10:T>G   | TGCAGTCACTGTTTGTCTGAAGCAATTAGCCTATGATCTTGTGGAGCTGCTGTTGTCACTGCATTTTC    | Chr02 | 6247633  | 10:T>G |
| 5  | 7629039 F 0-39:A>T-39:A>T   | TGCAGTACAGAAAACCAACCAGCAGAAAGATAATTTTATAATGAACAGCTCAGGAACCCAGTTGGCTAG   | Chr03 | 24217089 | 39:A>T |
| 6  | 7561292 F 0-28:A>G-28:A>G   | TGCAGTTGACTCATCCCAACCGACCTACACATTATCAAAACAATTAAGATCGGAAGAGCGGTTACAGCA   | Chr03 | 3304180  | 28:A>G |
| 7  | 11826044 F 0-66:G>A-66:G>A  | TGCAGTCCATATCAGAATGACAATTCTGTAGAGATTGCACAATCCTTTGGGTTTTCTTCTGCGTACGAT   | Chr04 | 31341133 | 66:G>A |
| 8  | 7569592 F 0-50:G>A-50:G>A   | TGCAGAAGATGGTGGTTGCGACAGAAATGAAAGAATGGAGTAAGCAGAGAAGGCCATTACCCCTTCTGAT  | Chr04 | 5305718  | 50:G>A |
| 9  | 7552489 F 0-18:T>G-18:T>G   | TGCAGATAAAAGGTAATAACCAACCACAAATCTAACTGTCTCTACATTCTTCTATCAAAATTTGG       | Chr05 | 24475925 | 18:T>G |
| 10 | 7562059 F 0-41:A>G-41:A>G   | TGCAGATGAAATGAAATGAAAACCTTTAGTGCATATCATGTAAGCAATGTAATTGAAATCCACTAAGAG   | Chr05 | 892499   | 41:A>G |
| 11 | 9847708 F 0-17:G>C-17:G>C   | TGCAGAAAAACATACGCGGTGGATTGATGTTCTCAAAACAATGGAAGATGCAGAAAGTAAACCTGACT    | Chr06 | 19672316 | 17:G>C |
| 12 | 7558428 F 0-52:C>T-52:C>T   | TGCAGCTACAACCTTTGACAAGCTGGCATCTATTAGTTACGTTTTGTTCCCTTCATGTGGCACTCTTGAT  | Chr06 | 4639839  | 52:C>T |
| 13 | 9845663 F 0-25:T>G-25:T>G   | TGCAGTTTACTAAGTAAGATGATATTCAGCGAGATGAAAACCTAGGATGAGTGTGAAGGAATACAAG     | Chr07 | 23485155 | 25:T>G |
| 14 | 7618077 F 0-38:G>A-38:G>A   | TGCAGATCTTGAGCAGGTTGTAATAAAGTGTGAGAGTGAATTAGTTACCACAATCTTGTAAATTTAG     | Chr07 | 5042144  | 38:G>A |
| 15 | 100588703 F 0-44:T>C-44:T>C | TGCAGGCAACTTTATTGAAATGTTGACTAAAATCTGTTTTCTGTCAAGCTTCAACATAGACCTCATTG    | Chr08 | 15171824 | 44:T>C |
| 16 | 100512185 F 0-24:A>G-24:A>G | TGCAGTATCCGAAATCCCTTTCCAAATGTTTGCTATAAGCTGGTTGAGAAGGAGAAAAGTTAGGGAA     | Chr08 | 6218106  | 24:A>G |
| 17 | 7568783 F 0-21:T>A-21:T>A   | TGCAGTGCAATGCATGAGCCTCTGGCAACGTTGAGAAGTCAACCCGTTGCAGTTTCTCGGTCACGTCGGT  | Chr09 | 22534529 | 21:T>A |
| 18 | 14313832 F 0-18:G>A-18:G>A  | TGCAGATATAATGAAAAAGCACATAAAAAGTGACAAGAAATTAACAATTAGGTACACTTGCTGCATCT    | Chr09 | 520352   | 18:G>A |
| 19 | 7554048 F 0-9:G>A-9:G>A     | TGCAGTATCGAAAGCAATGTCTTTGGTCTTCTGTTAGGTTTCTCTCTCTTCCATTTCTATTTTACA      | Chr10 | 4446069  | 9:G>A  |
| 20 | 7574585 F 0-20:A>G-20:A>G   | TGCAGAACTCCCAAAGGAGATAGGAAATTTGCATCACTAAGGTACATTGATTACAGATCGGAAGAG      | Chr10 | 6952705  | 20:A>G |
| 21 | 7619107 F 0-63:G>T-63:G>T   | TGCAGTGACGATCTTCCAATTAGCTCTTCTGCCCTTGAACAACAATCAAAATACTAGCTTGTCTGTT     | Chr11 | 18928235 | 63:G>T |
| 22 | 7611165 F 0-24:G>T-24:G>T   | TGCAGTCAATCAGATAGAACAATCGTTTAGTCTTAGTTATGGTATTGATAGGGGGAGTATACGATTA     | Chr11 | 2783237  | 24:G>T |
| 23 | 7558251 F 0-66:C>A-66:C>A   | TGCAGCCCGTGACACCAACAACCCCTATTTTTCCGCCAGTTTTGTTCTCACTTGGCGGGAAACCC       | Chr12 | 1719732  | 66:C>A |
| 24 | 7619930 F 0-17:C>A-17:C>A   | TGCAGAGGATAAAAGTTCTGTACCCAAACAGGGGCTTTTACAGATCGGAAGAGCGGTTACAGGAAAT     | Chr12 | 24038510 | 17:C>A |
| 25 | 7562142 F 0-54:C>T-54:C>T   | TGCAGATTGTGAATCCCTTTAGAGTCAGCAACAGAGGCACTCTCGGTGATTCTCTTCTCATTATTATC    | Chr13 | 22402544 | 54:C>T |
| 26 | 100589662 F 0-45:C>T-45:C>T | TGCAGTAATGATTTGGATATAGCACATACATATAAATATATAACAATATAGTATTATTTTCAGCAAA     | Chr13 | 7074575  | 45:C>T |
| 27 | 100619651 F 0-17:C>T-17:C>T | TGCAGTTGCTTAGCTCCGCTACTTTGTTGGGTGGCCTTCTCTTGCAGGTAATTTGAAGTACTAATCA     | Chr14 | 17915206 | 17:C>T |

| No | AlleleID                   | AlleleSeq                                                              | Chr   | Pos      | SNP    |
|----|----------------------------|------------------------------------------------------------------------|-------|----------|--------|
| 28 | 15728547 F 0-52:T>A-52:T>A | TGCAGTTTTATTGAAGCTGAAAAGTTTGATCAGAGAGGGAGAGAGAGTTTGAGTGAGGAAAAGAATGAAG | Chr14 | 3121906  | 52:T>A |
| 29 | 7559173 F 0-7:T>C-7:T>C    | TGCAGTATATGTATTATCAAATATGTGAAACGAGAATGATGACAGGTCAATCTAGAAGTGTAGCACATT  | Chr15 | 11417254 | 7:T>C  |
| 30 | 9845617 F 0-25:C>A-25:C>A  | TGCAGTTCCTGCACTTCCAGTGAACCCCGATATATGCTCTCCGCATATAACACTCAGCAATGAATTC    | Chr15 | 8808402  | 25:C>A |

  

| Trait-Specific Markers |                                           |                  |       |          |     |
|------------------------|-------------------------------------------|------------------|-------|----------|-----|
|                        | Trait                                     | Genetic Position | Chr   | Pos      | SNP |
| 31                     | Dry matter & Starch<br>β-Carotene & Flesh | 37.44            | Chr03 | 3185578  | C>T |
| 32                     | color<br>β-Carotene & Flesh               | 36.14            | Chr03 | 2994719  | C>G |
| 33                     | color                                     | 146.02           | Chr12 | 22131994 | G>A |
| 34                     | Starch                                    | 147.31           | Chr12 | 22197168 | T>A |
| 35                     | Dry matter                                | 150.05           | Chr12 | 22369268 | A>T |
| 36                     | Storage root yield                        | 4.19             | Chr15 | 452966   | A>C |

626

627

628

629

630

631

632

633

## Original

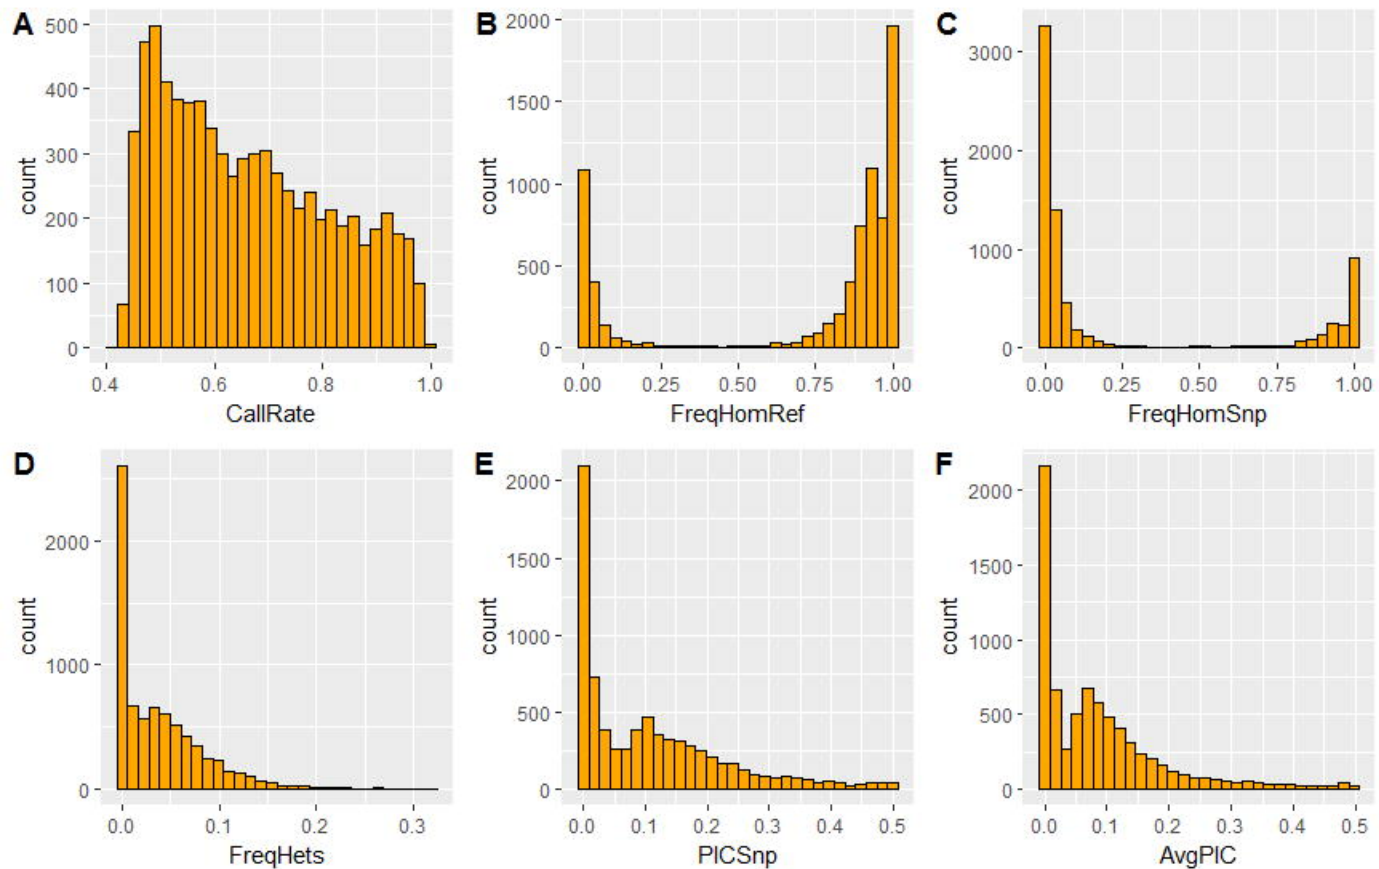

## Filtered

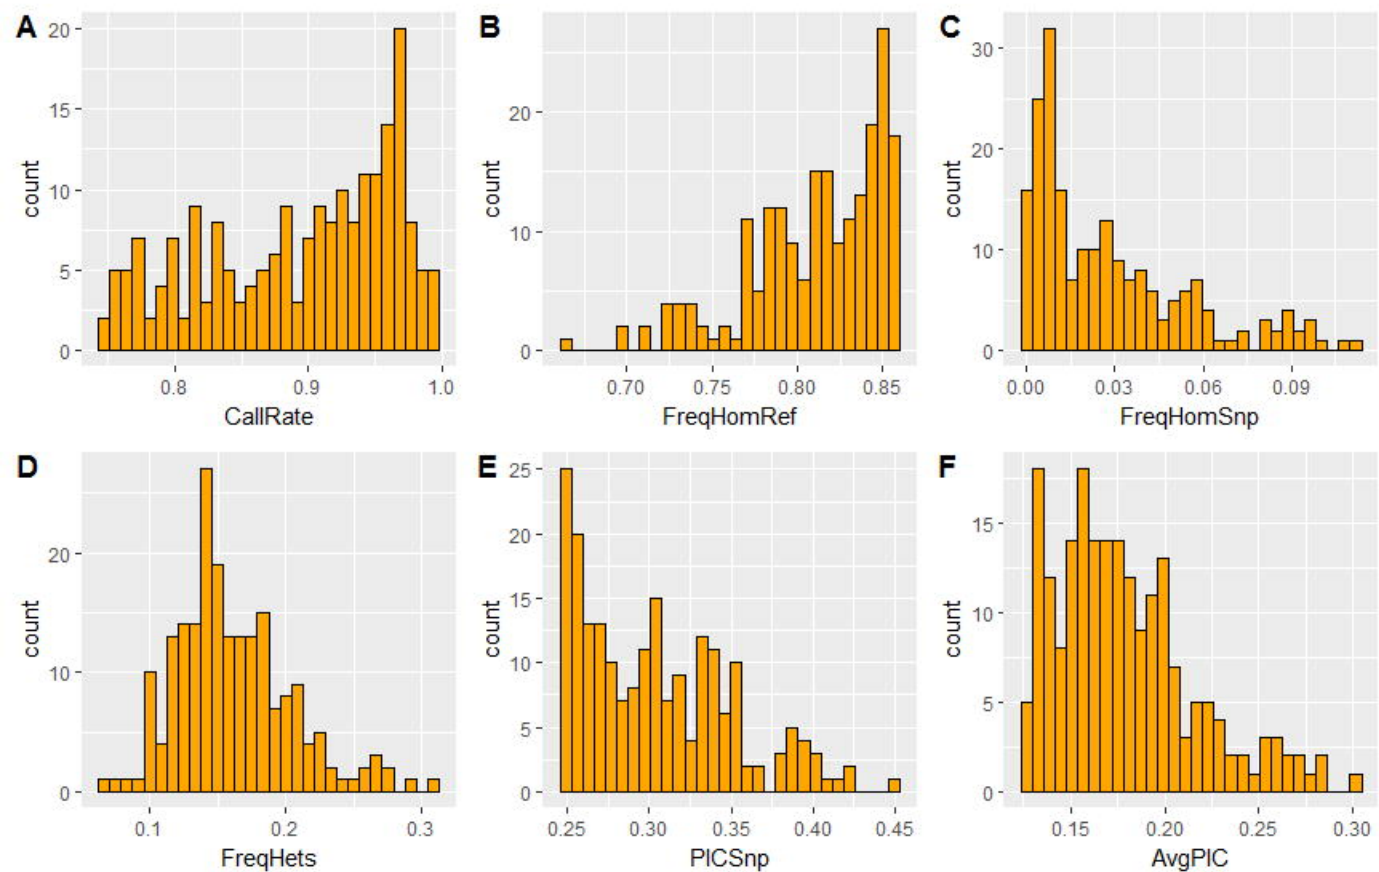



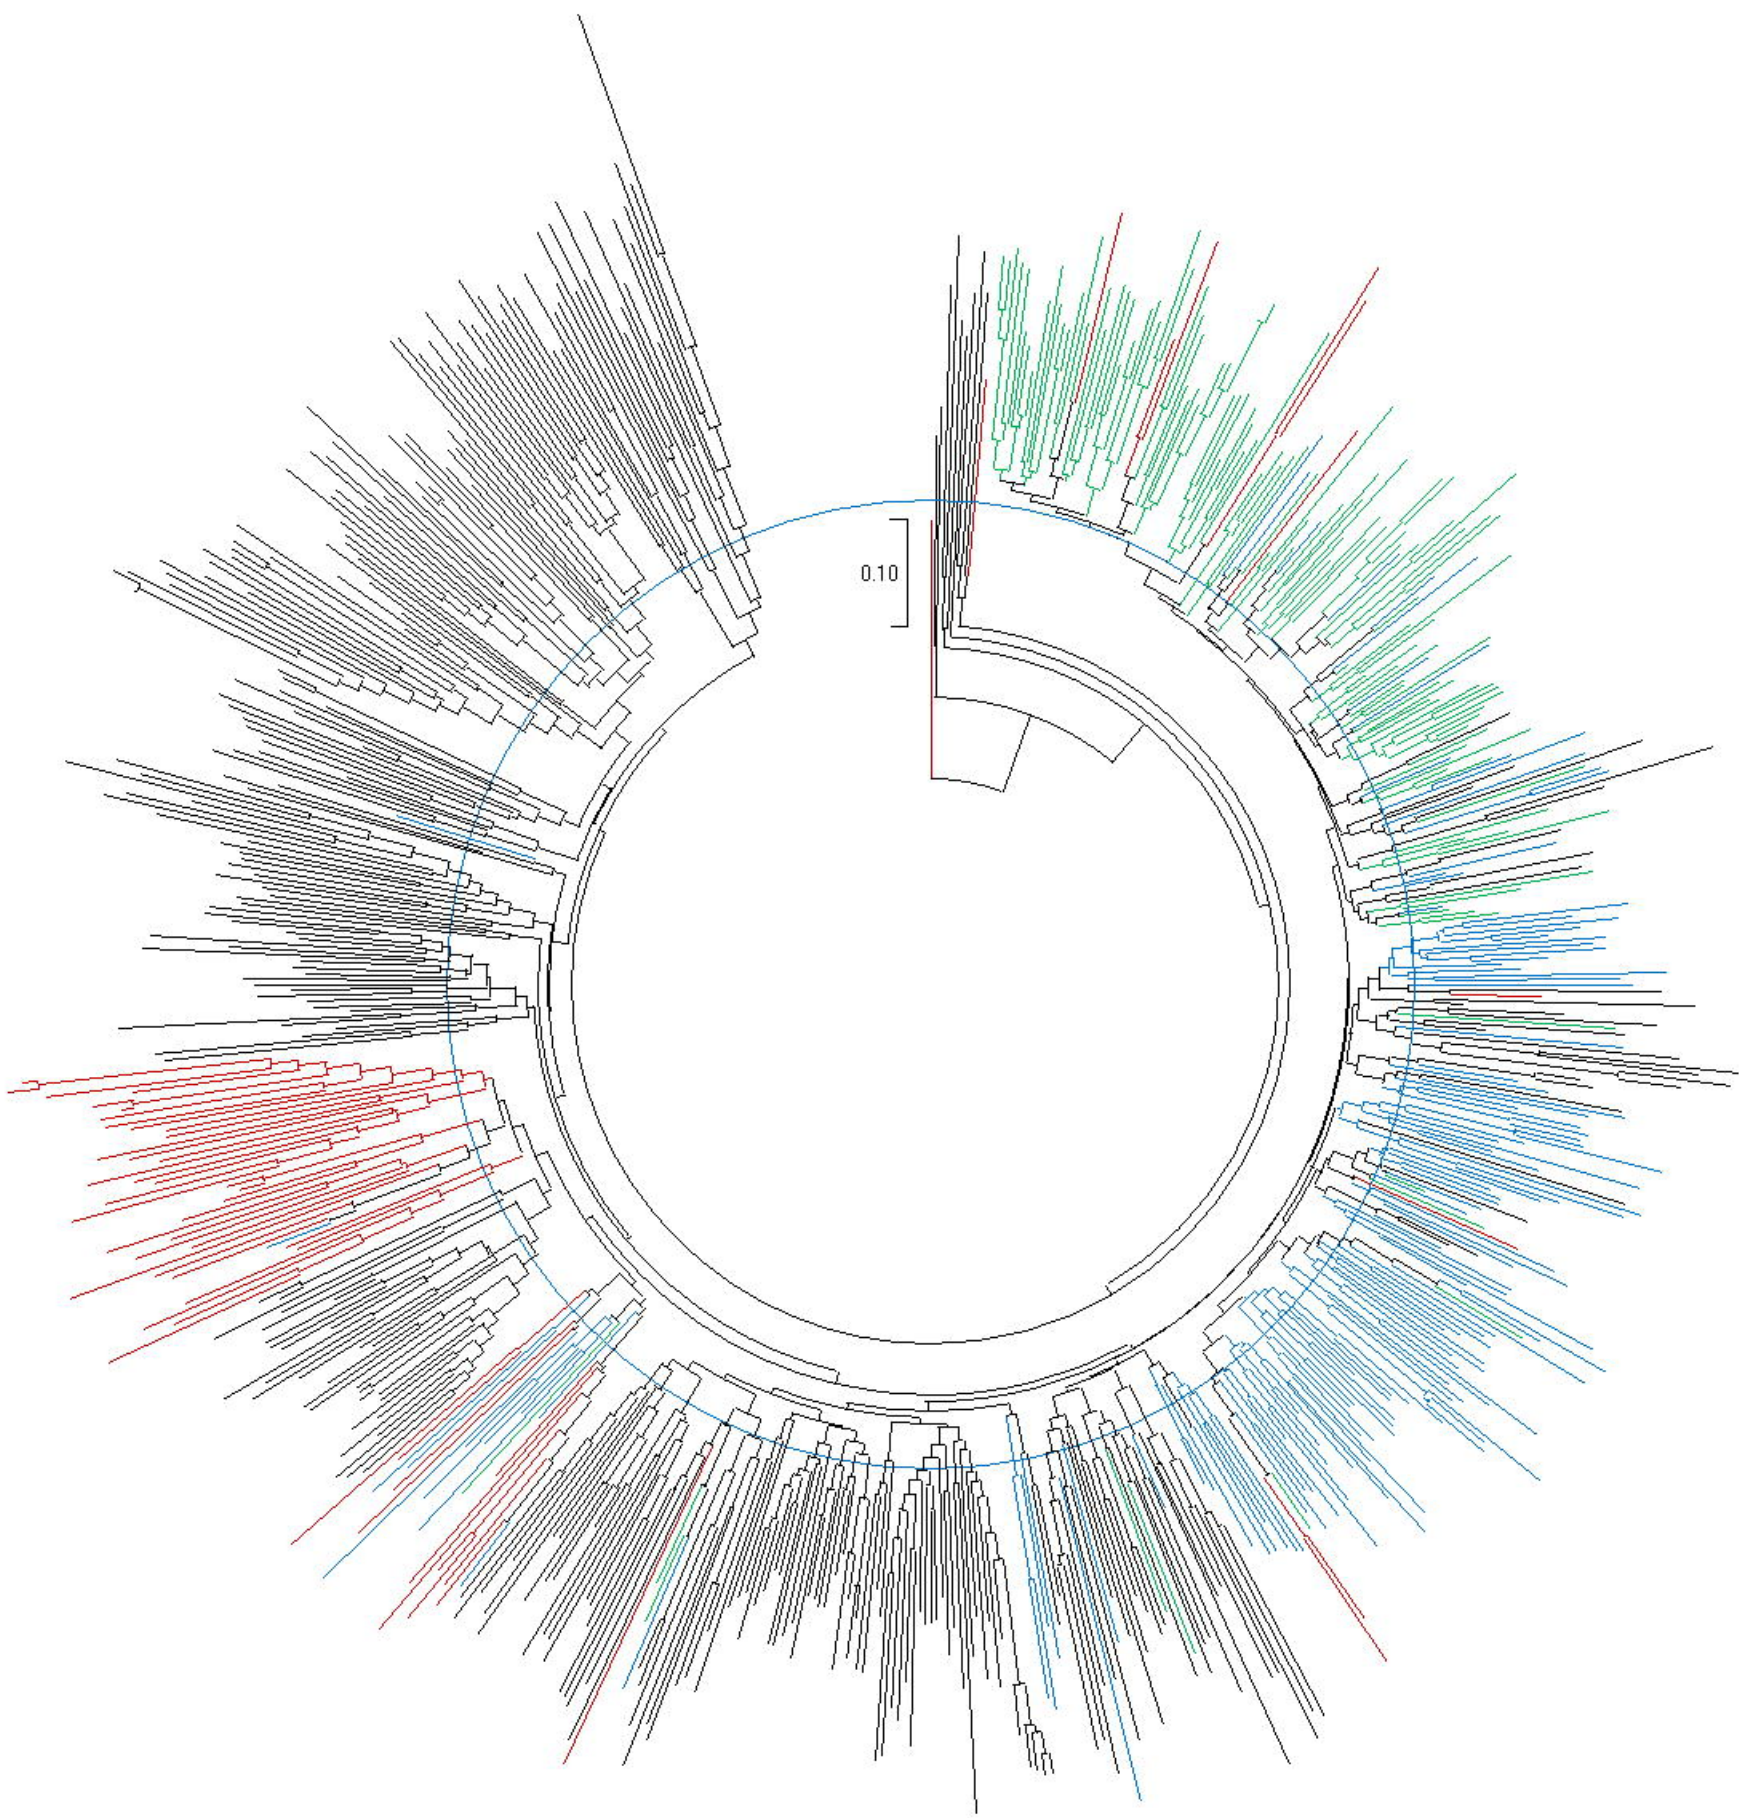

Chr02

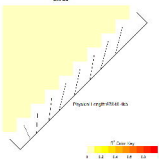

Chr01

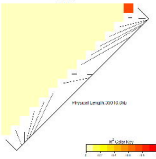

Chr02

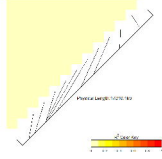

Chr03

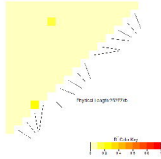

Chr04

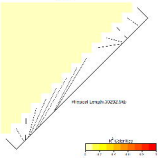

Chr05

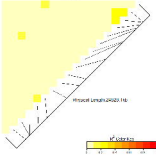

Chr06

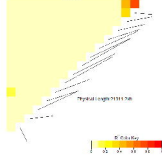

Chr07

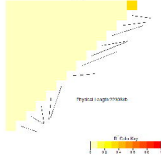

Chr08

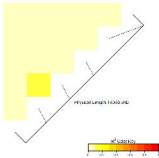

Chr09

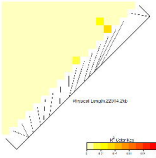

Chr10

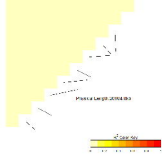

Chr11

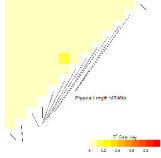

Chr12

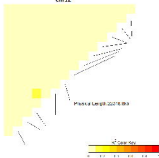

Chr13

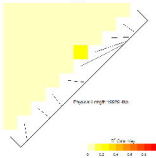

Chr14

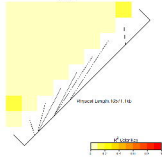

Chr15

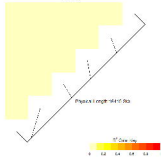

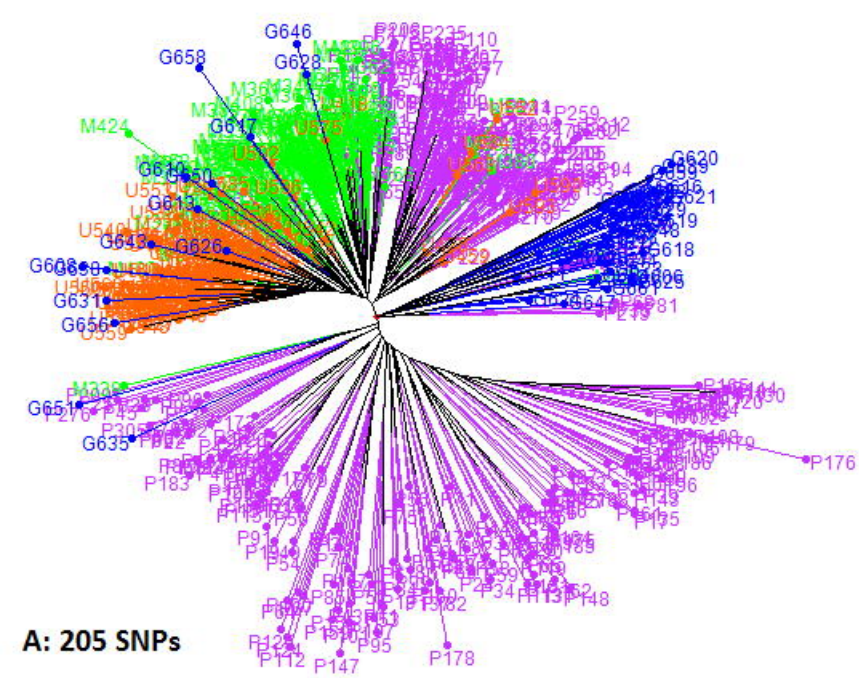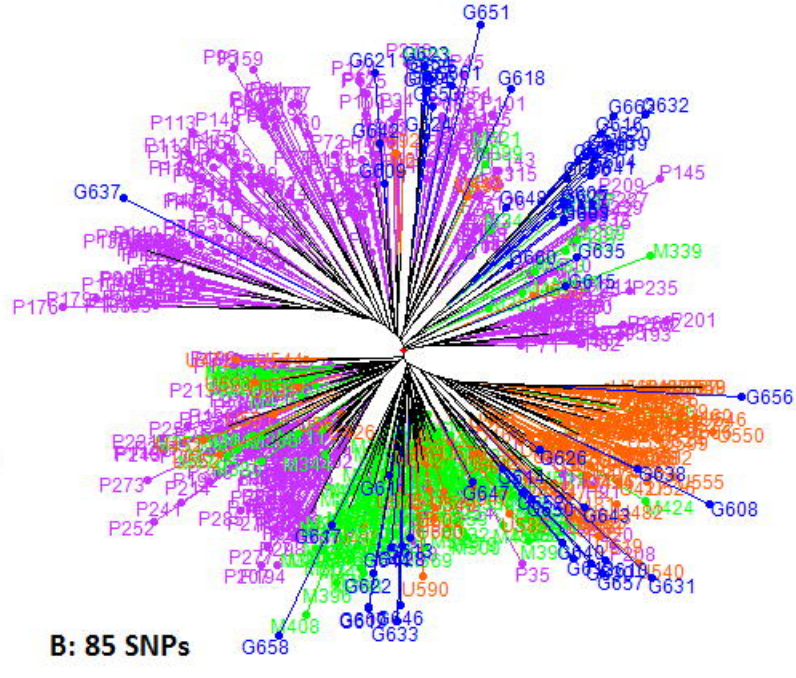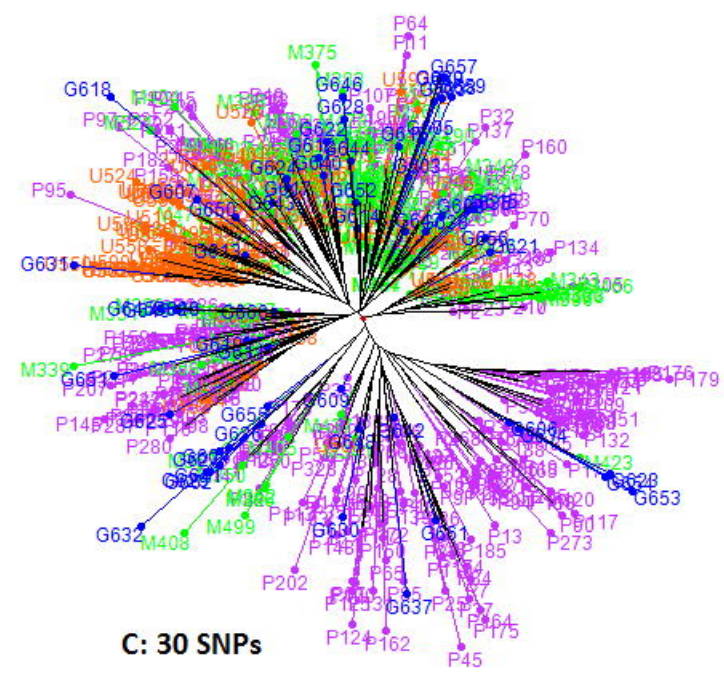

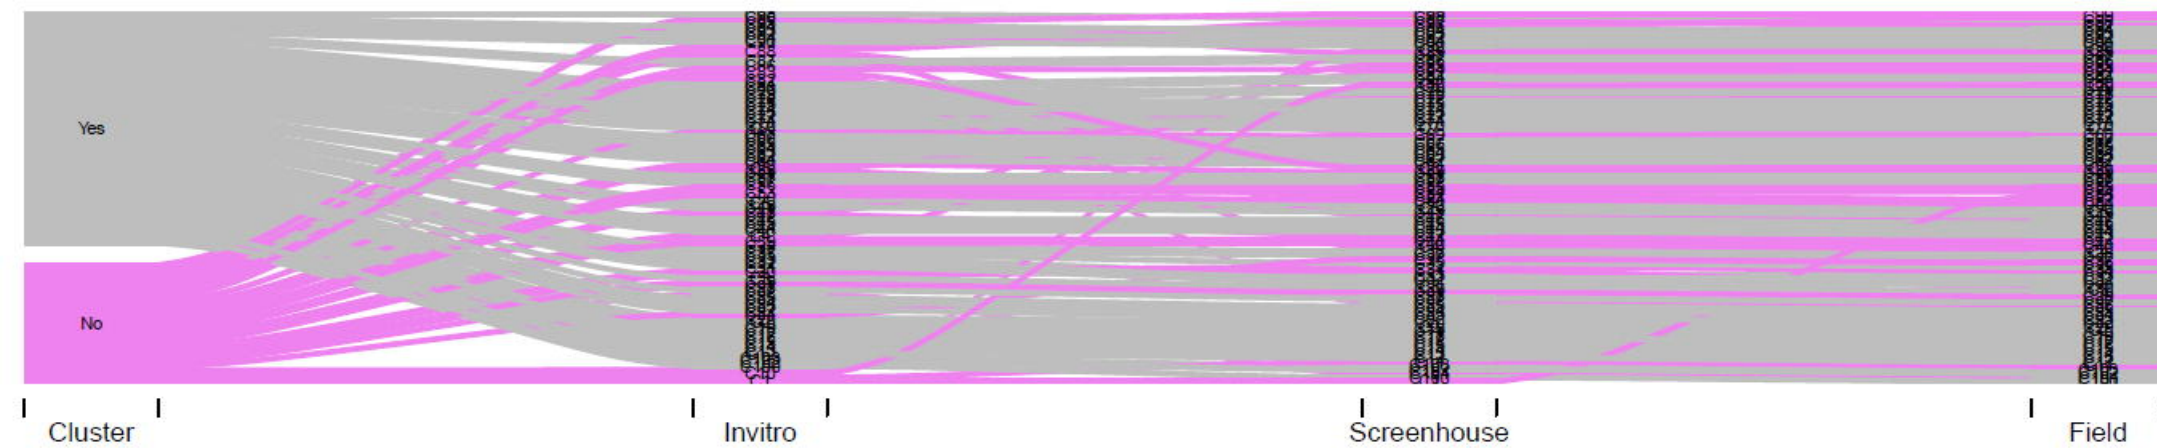

10,159 SNPs  
Error = 27.7%

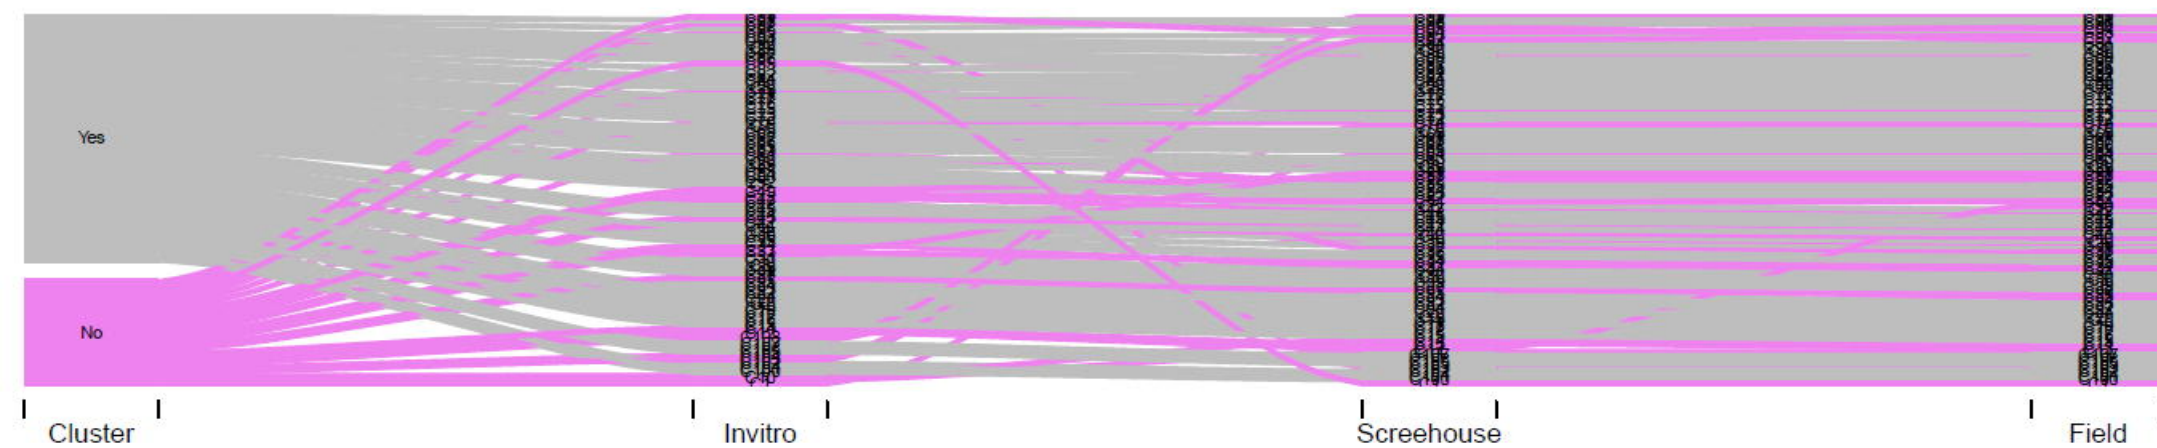

85 SNPs  
Error = 29.8%

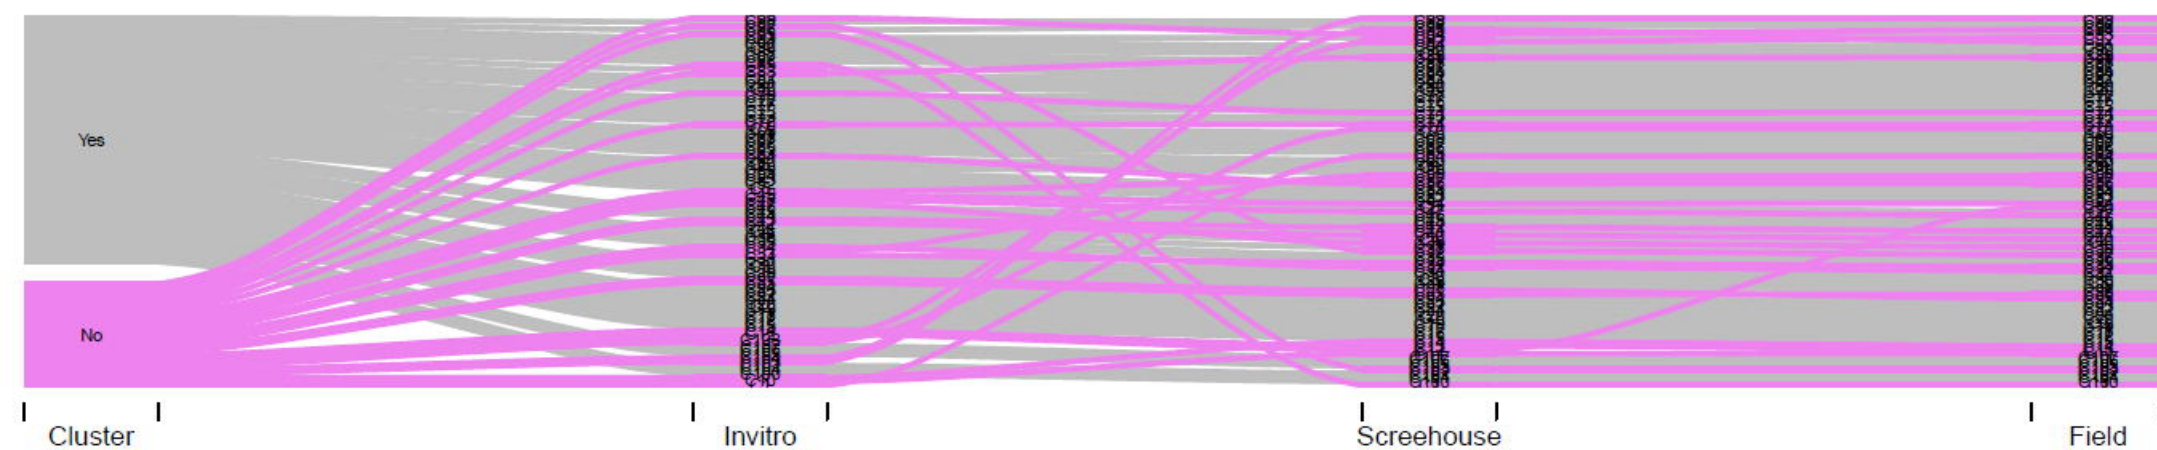

30 SNPs  
Error = 31.9%
